# Supplementary material for: Deriving Heterospecific Self-Assembling Protein–Protein Interactions Using a Computational Interactome Screen
Source: PubMed Central journal article supplement (PMC4751974; doi:10.1016/j.jmb.2015.11.022), 2016-01-29

Figure S1a

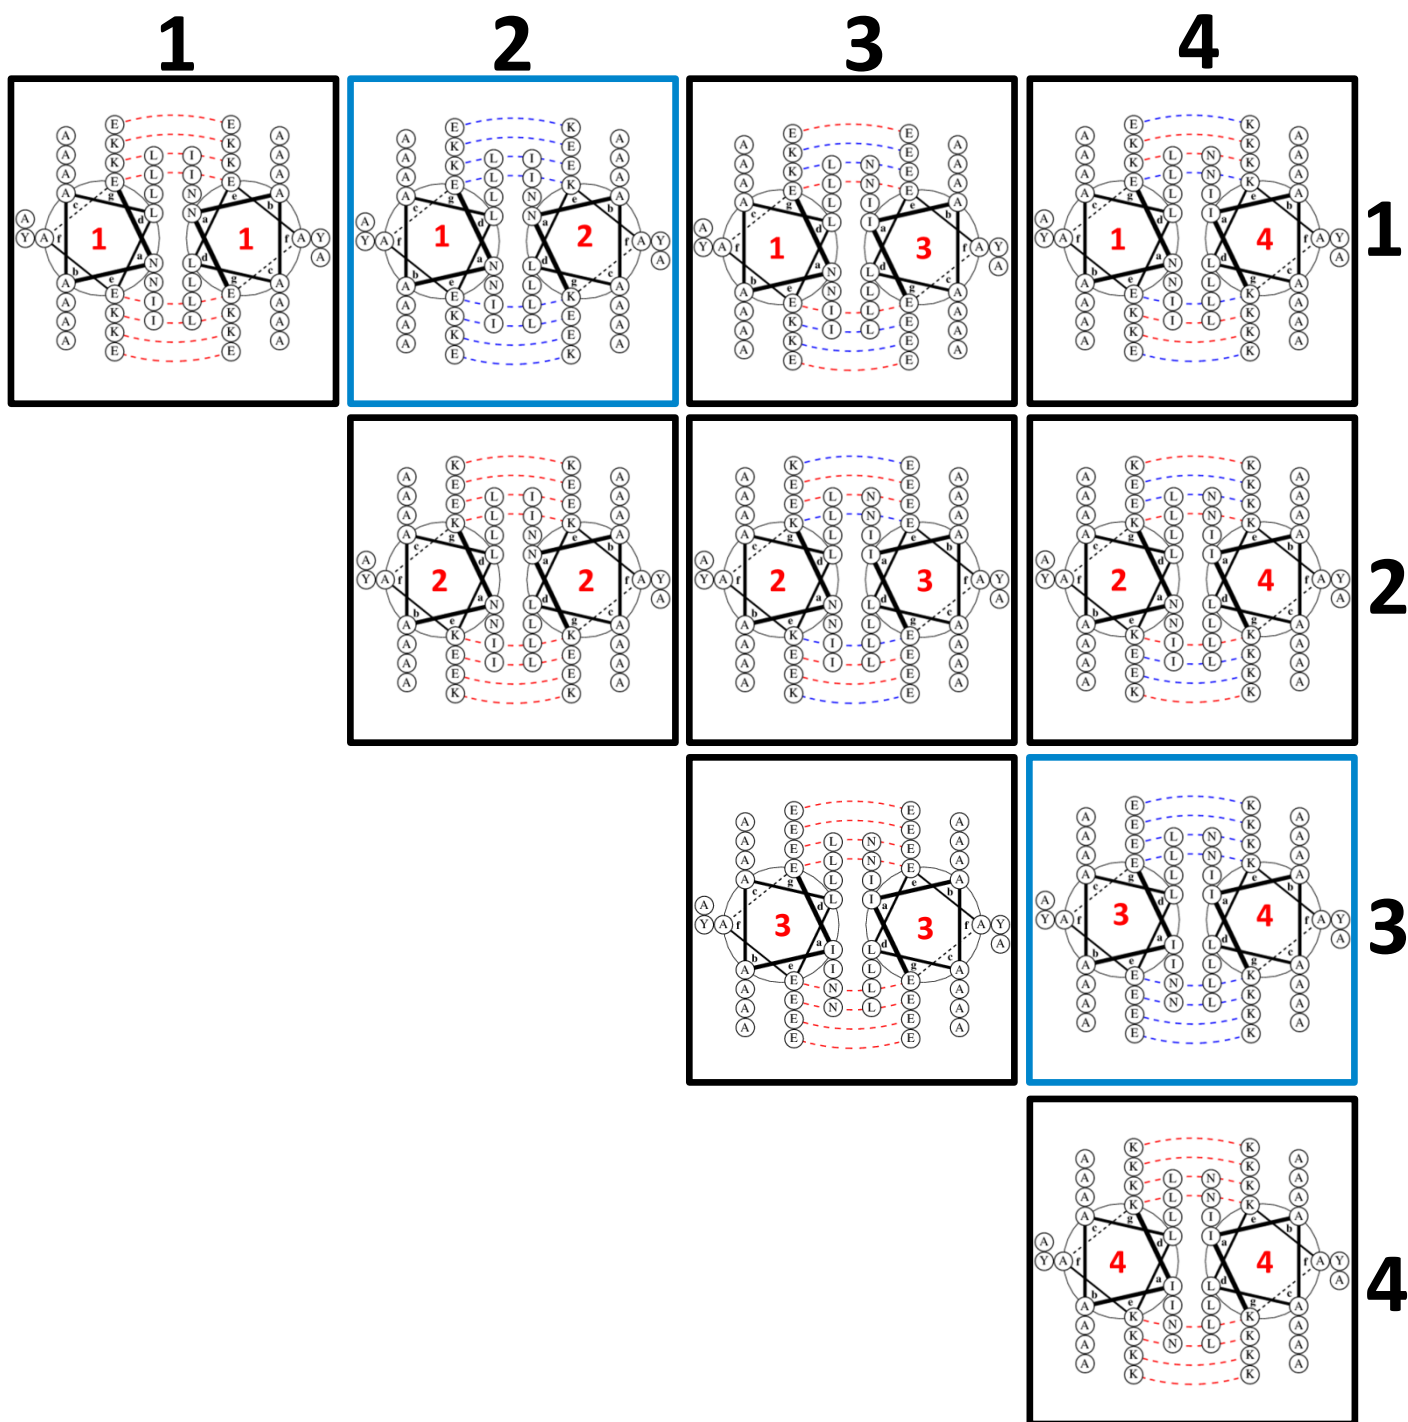

Figure S1b

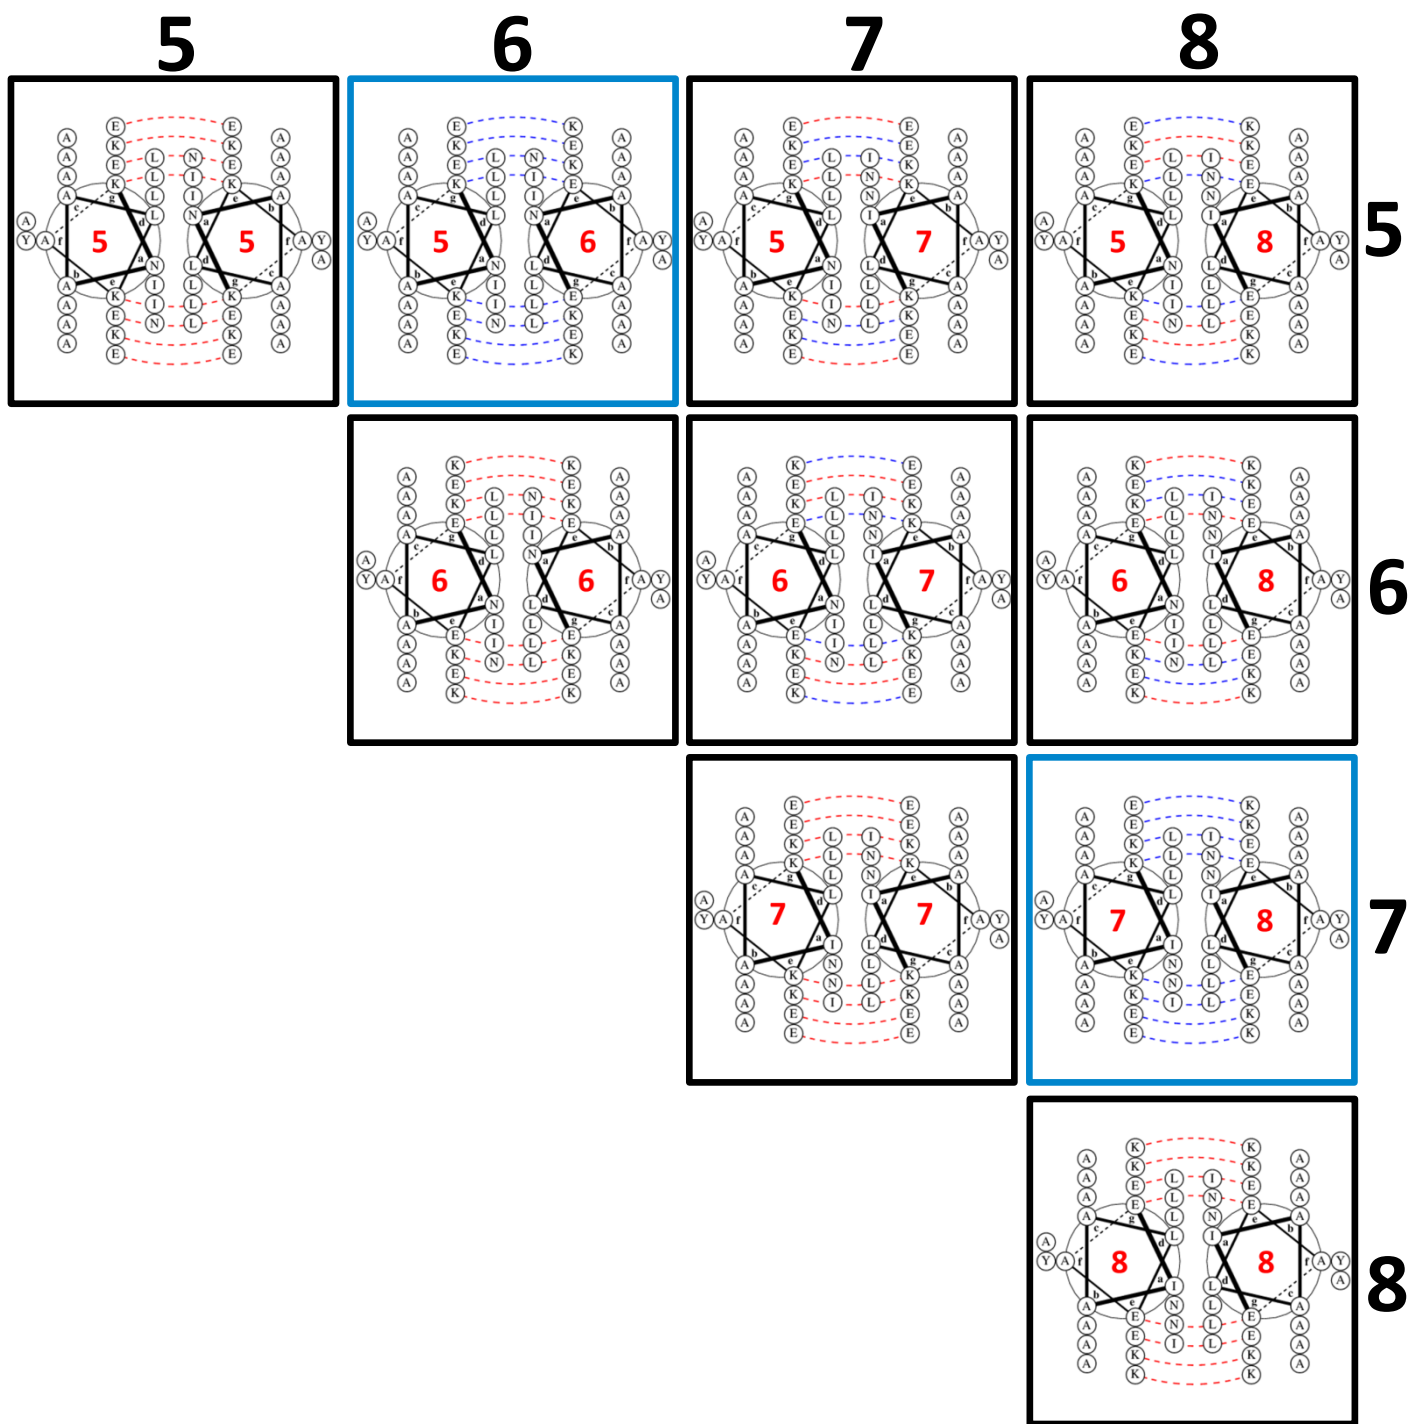

Figure S1c

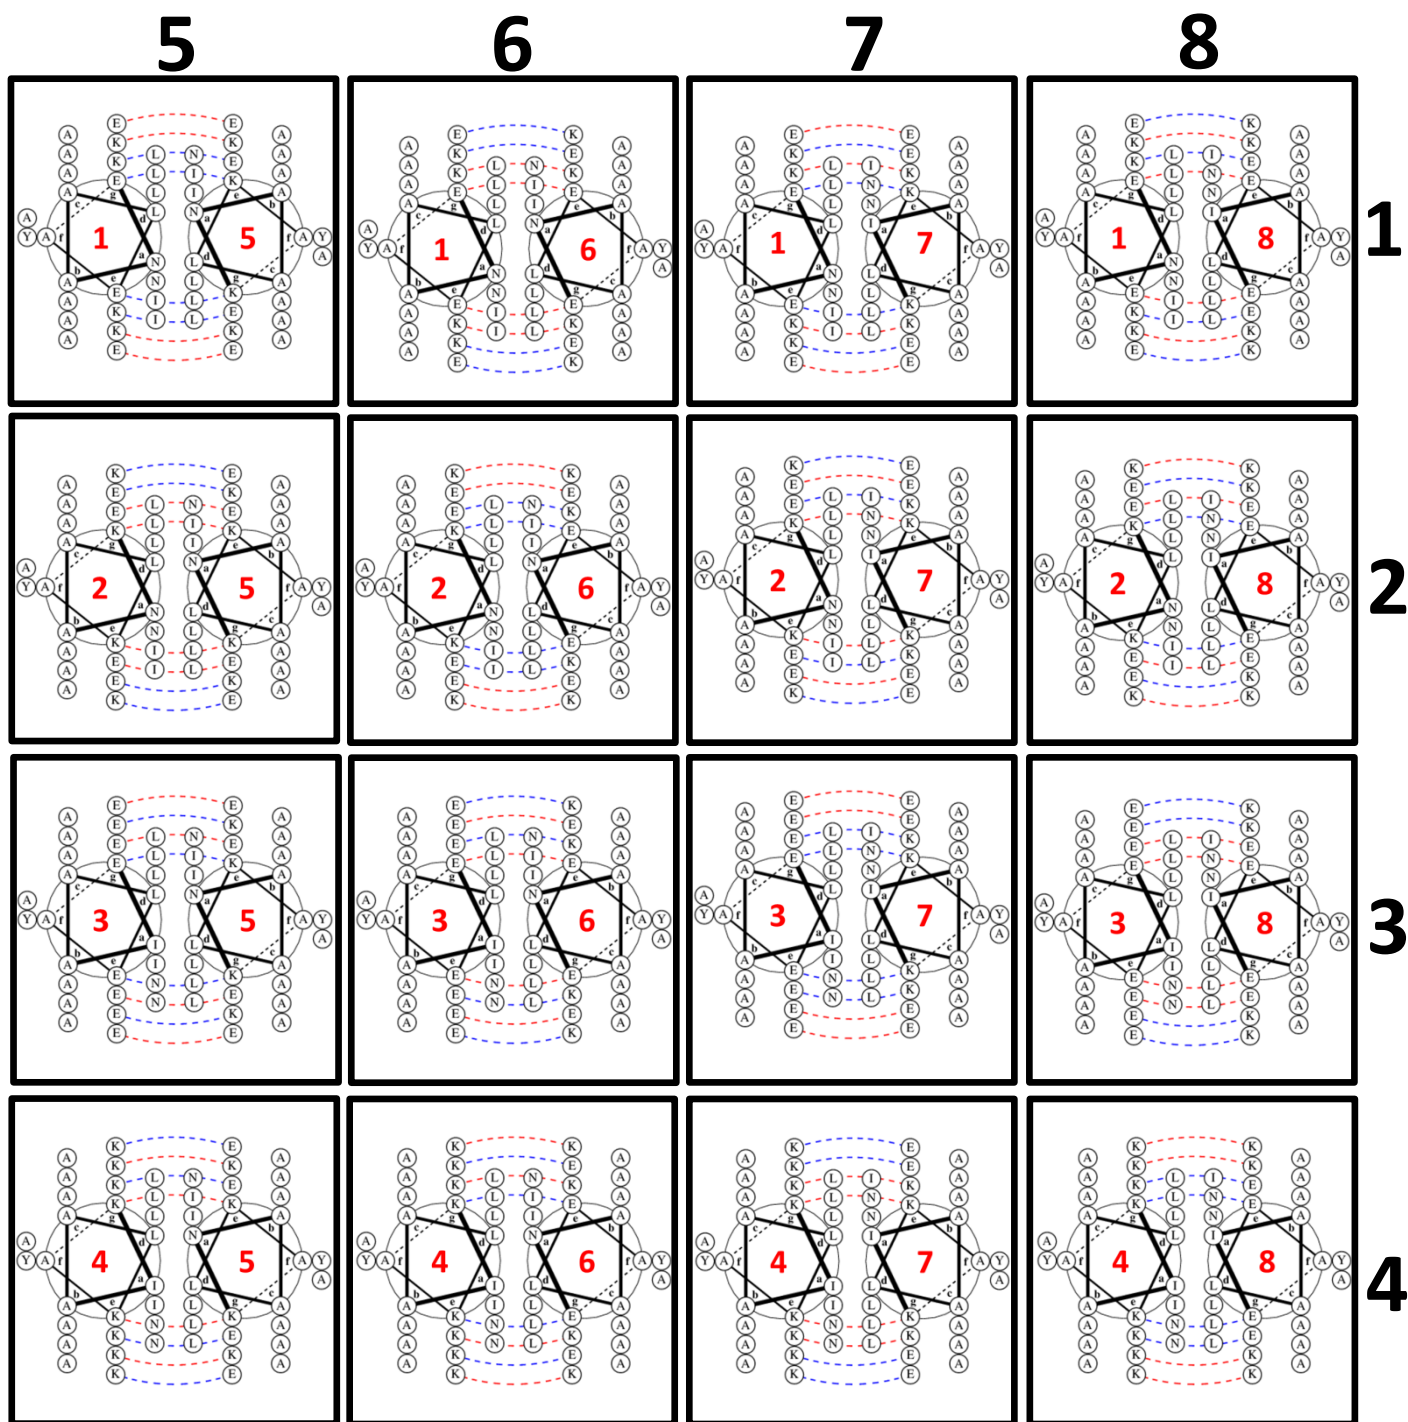

Supplement: mmc2.pdf [file mmc2.pdf]
